# Supplementary material for: Disparity-amplified chiral SERS using a PSP–LSP-coupled substrate
Source: Royal Society of Chemistry journal article supplement (doi:10.1039/d5nr00088b), 2025-01-01
Supplement: d5nr00088b1.pdf [file d5nr00088b1.pdf]

## Supplementary Information

### Disparity-Amplified Chiral SERS Using PSP-LSP Coupling Substrate

Chiyi Wei,<sup>‡a</sup> Yanlong Li,<sup>‡a</sup> Haijiao Xu,<sup>b</sup> Molei Hao,<sup>a</sup> Tianxi Wang,<sup>a</sup> Weiyuan Huang,<sup>a</sup>  
Wanlu Cao,<sup>a</sup> Zihao Li,<sup>\*a</sup> Xiaoming Wei<sup>a</sup> and Zhongmin Yang<sup>a,c</sup>

a. School of Physics and Optoelectronics, State Key Laboratory of Luminescent Materials and Devices, Guangdong Engineering Technology Research and Development Centre of Special Optical Fibre Materials and Devices, Guangdong Provincial Key Laboratory of Fibre Laser Materials and Applied Techniques, South China University of Technology, Guangzhou 510640, China.

b. School of Mechanical and Electronic Engineering, Jingdezhen Ceramic University, Jingdezhen 333403, China.

c. Research Institute of Future Technology, South China Normal University, Guangzhou 510006, China.

<sup>‡</sup> These authors contributed equally.

\* Corresponding author: phlzh@scut.edu.cn.

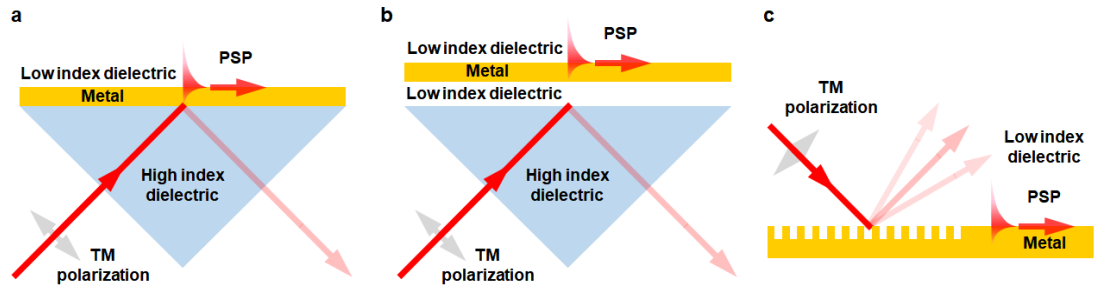

**Figure S1.** (a) Otto configuration, (b) Kretschmann-Raether configuration, and (c) grating-coupled configuration.

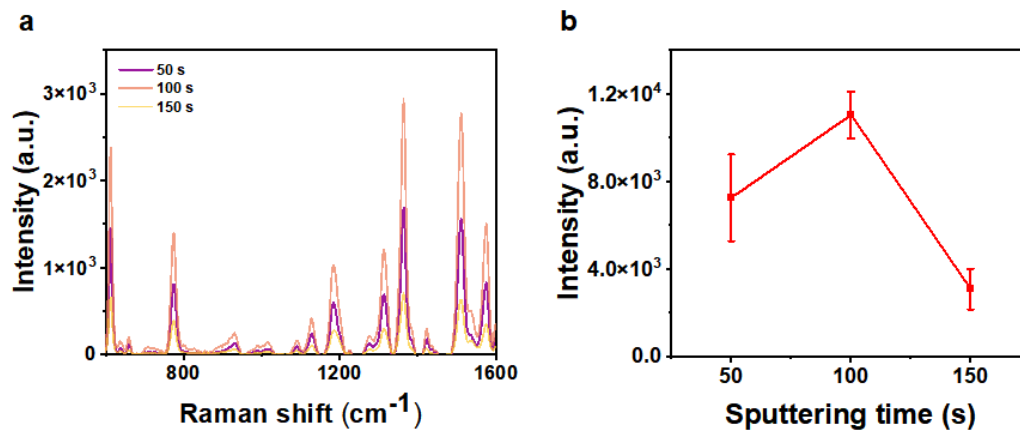

**Figure S2.** (a) SERS spectra of R6G on LIPSS with gold sputtered for 50 s, 100 s, and 150 s and the corresponding (b) intensities of Raman peak at  $610 \text{ cm}^{-1}$ .

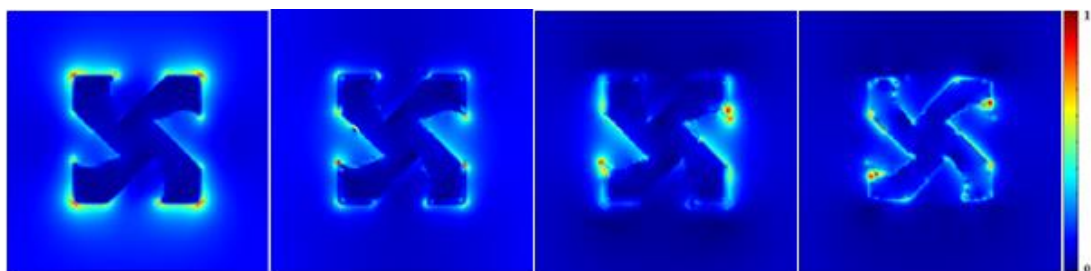

**Figure S3.** Electric field intensity around 432 helicoid III excited by light with wavelengths of 532 nm, 638 nm, 785 nm, and 1064 nm (from left to right), respectively.

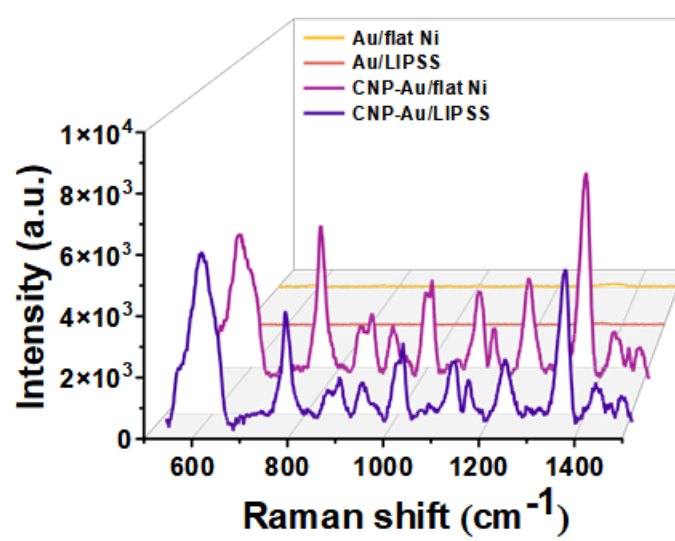

**Figure S4.** SERS spectra of L-Trp on various substrates.

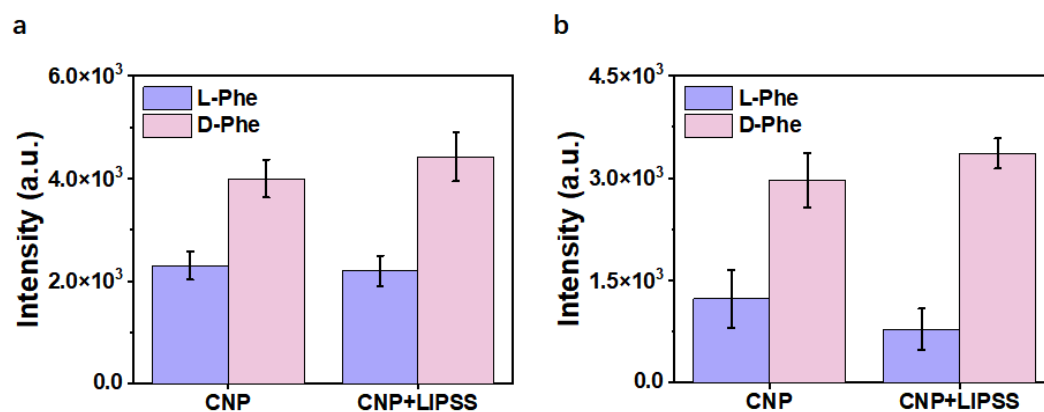

**Figure S5.** SERS intensities of Raman peak at (a) 1031 cm<sup>-1</sup> and (b) 1207 cm<sup>-1</sup> of Phe enantiomers on self-assembled CNPs on Au-coated flat Ni sheet and CNP-Au/LIPSS composite substrate, respectively.

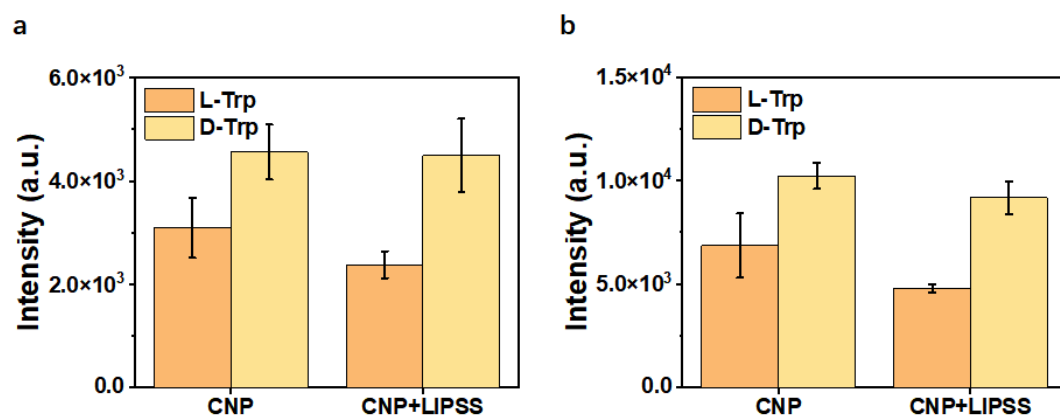

**Figure S6.** SERS intensities of Raman peak at (a) 1008 cm<sup>-1</sup> and (b) 1357 cm<sup>-1</sup> of Trp enantiomers on self-assembled CNPs on Au-coated flat Ni sheet and CNP-LIPSS composite substrate, respectively.
